# Supplementary material
Source: Frontiers journal article supplement (https://www.frontiersin.org/articles/347526)
Supplement: Data_Sheet_1.PDF [file Data_Sheet_1.PDF]

*Supplementary Material*

**A model for a filling-in process triggered by edges predicts  
"conflicting" afterimage effects**

**Hadar Cohen-Duwek<sup>1</sup>, Hedva Spitzer<sup>1</sup>**

**\* Correspondence:** Corresponding Author: [hadarli@gmail.com](mailto:hadarli@gmail.com)

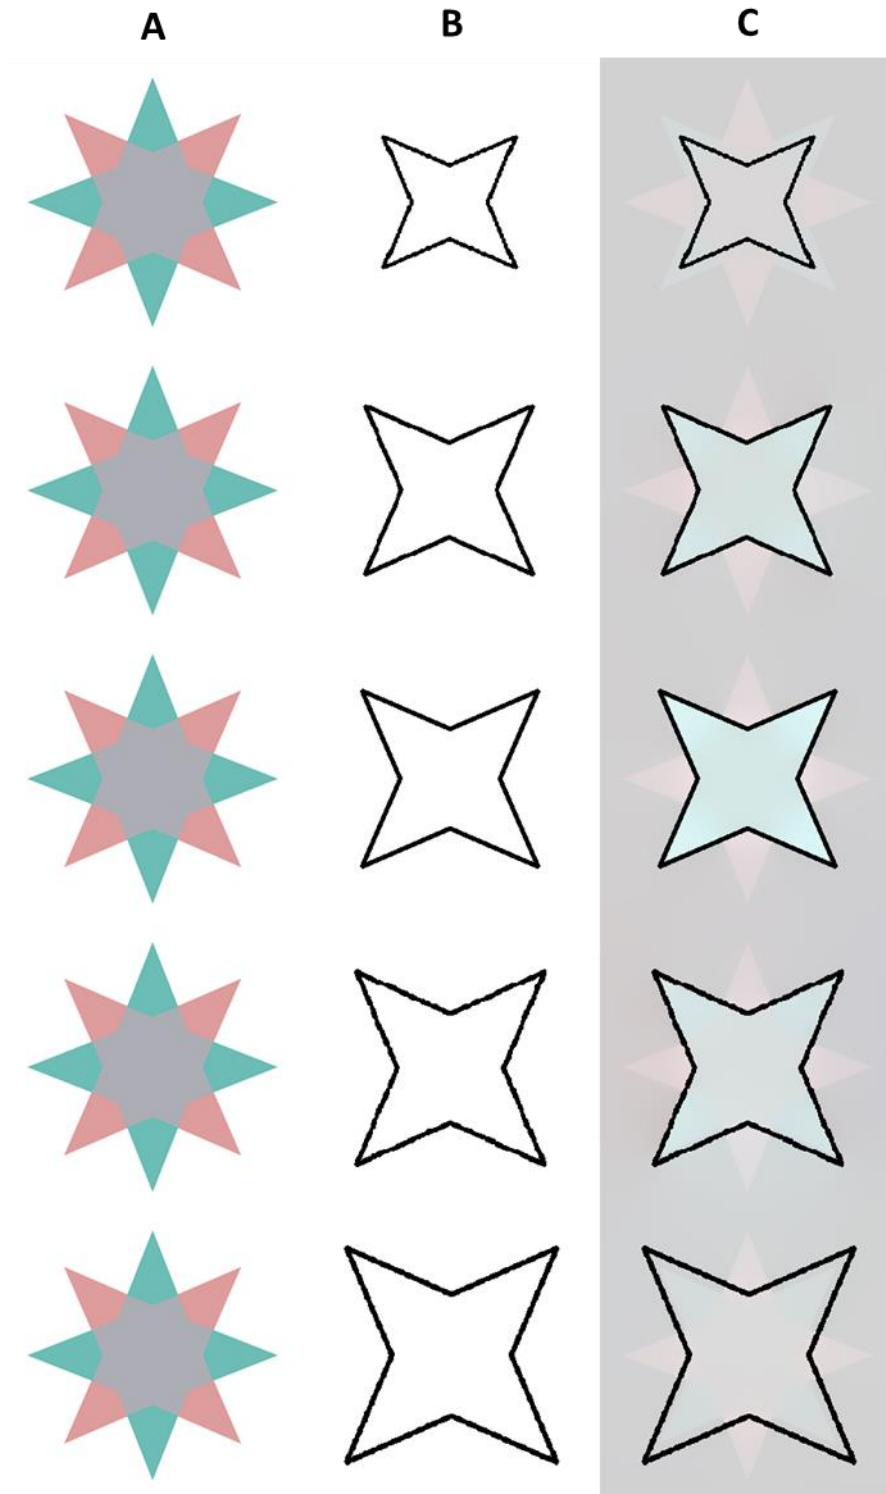

**Supplementary Figure 1.** The suggested model's predictions to experiment 3 of Kim and Francis, (2011). A) The chromatic stimulus. B) The remaining contours. C) The simulation results. The results demonstrate that: "These results imply that close proximity between the inducer and the contour enhanced the afterimage perception". (Kim & Francis 2011). Parameters:  $\alpha=1.3$  and  $\beta=0.3$ . Note that the value of  $\beta$ , in the above results, is slightly enhanced for this demonstration
